# Supplementary material
Source: PubMed Central journal article supplement (PMC7568266)
Supplement: pnas.1919641117.sapp.pdf [file pnas.1919641117.sapp.pdf]

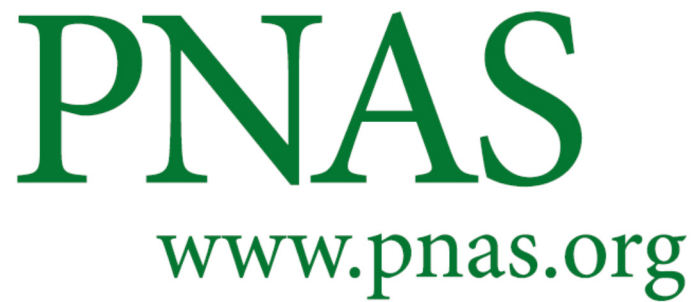

**Supplementary Information for**

**The 17-year spatiotemporal trend of PM<sub>2.5</sub> and its mortality burden in China**

Fengchao Liang <sup>a,b</sup>, Qingyang Xiao <sup>c</sup>, Keyong Huang <sup>b</sup>, Xueli Yang <sup>b</sup>, Fangchao Liu <sup>b</sup>, Jianxin Li <sup>b</sup>, Xiangfeng Lu <sup>b</sup>, Yang Liu <sup>d,\*</sup>, Dongfeng Gu <sup>a,b,e,\*</sup>

<sup>a</sup> Key Laboratory of Cardiovascular Epidemiology, Chinese Academy of Medical Sciences, Beijing 100037, China; <sup>b</sup> Department of Epidemiology, Fuwai Hospital, National Center for Cardiovascular Diseases, Chinese Academy of Medical Sciences and Peking Union Medical College, Beijing 100037, China; <sup>c</sup> School of environment, Tsinghua University, Beijing 100084, China; <sup>d</sup> Gangarosa Department of Environmental Health, Rollins School of Public Health, Emory University, Atlanta, Georgia 30322, USA; <sup>e</sup> Medical school, Southern University of Science and Technology, Shenzhen 518055, China.

\* Correspondence to:

Yang Liu and Dongfeng Gu

Email: [yang.liu@emory.edu](mailto:yang.liu@emory.edu) (Y.L.); [gudongfeng@cashq.ac.cn](mailto:gudongfeng@cashq.ac.cn) (D.G.)

**This PDF file includes:**

Figs. S1 to S10

Tables S1 to S2

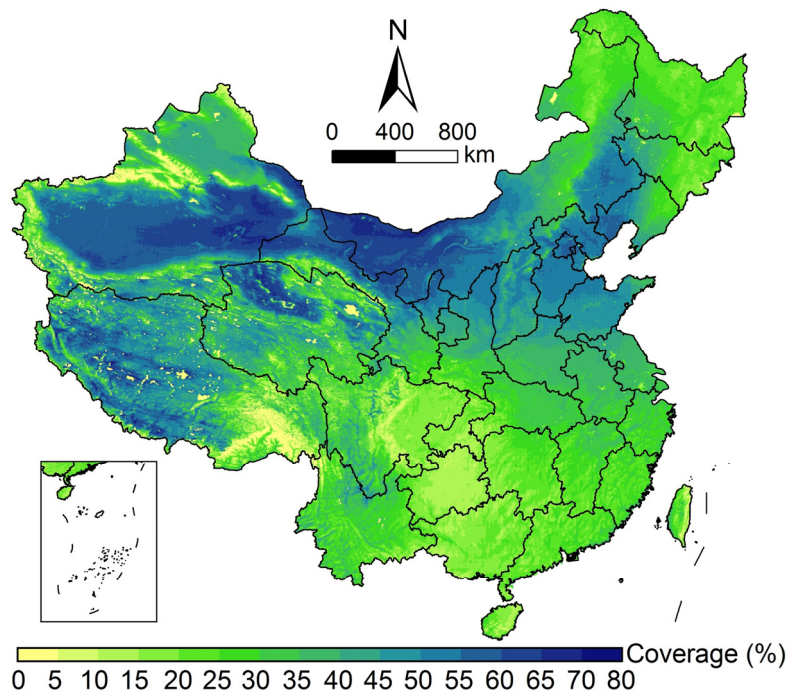

**Fig. S1.** Coverage of the Multi-Angle Implementation of Atmospheric Correction (MAIAC) aerosol optical depth (AOD) at the daily level from 2000 to 2016.

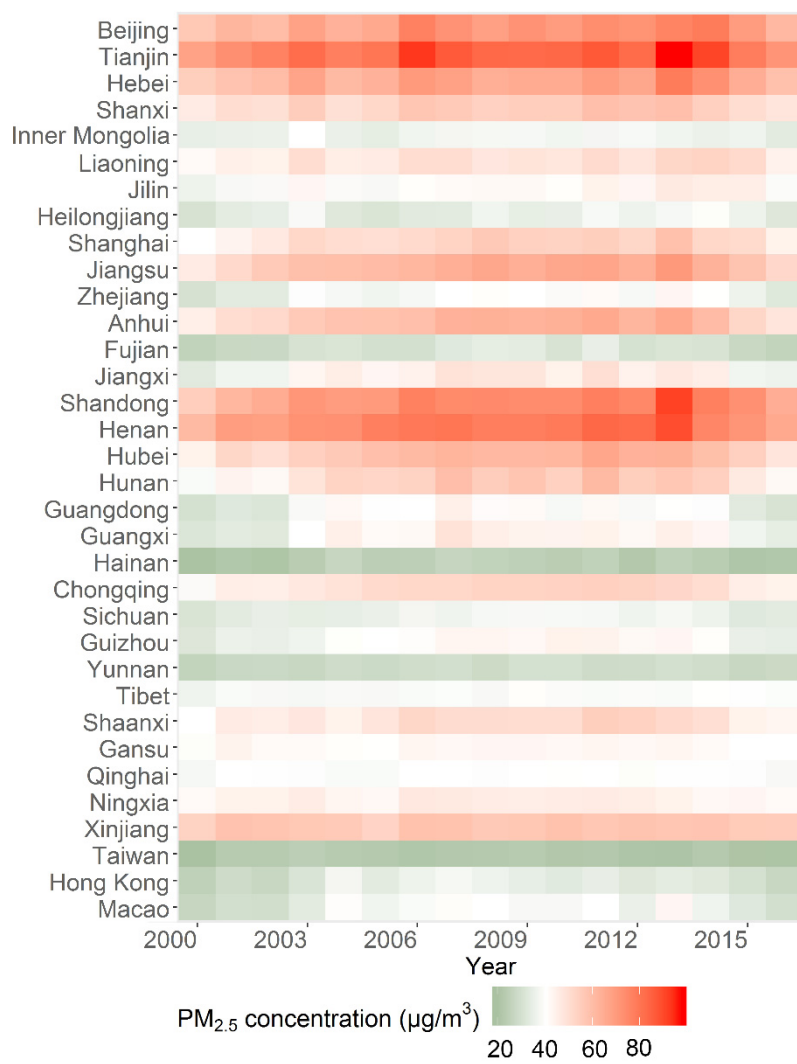

**Fig. S2.** Province-level spatiotemporal trends of annual mean PM<sub>2.5</sub> concentrations in China.

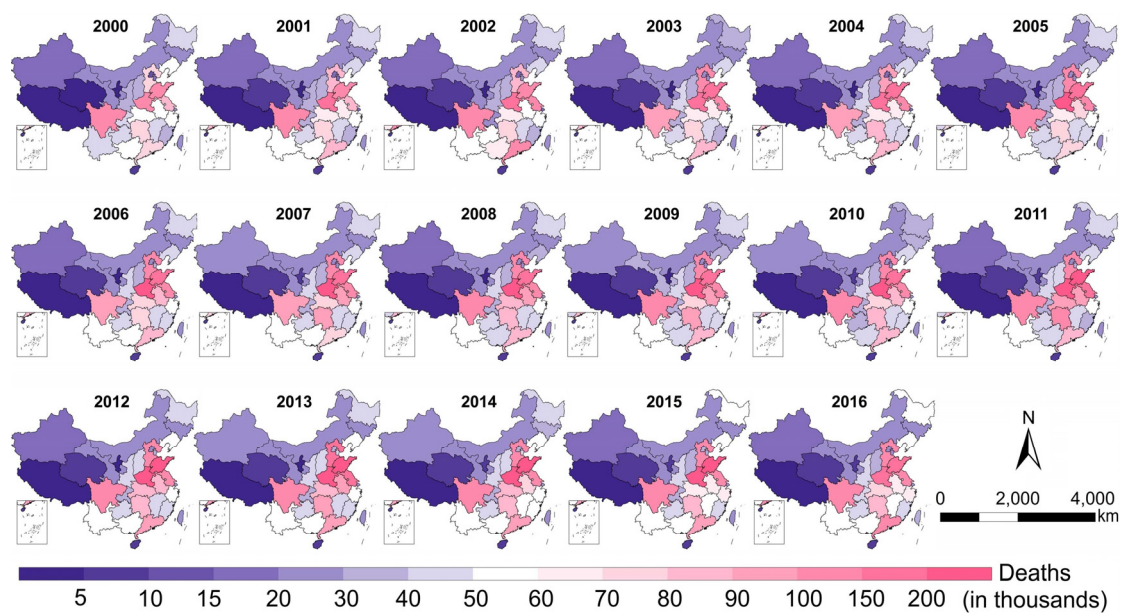

**Fig. S3.** Absolute number of annual premature deaths attributable to long-term PM<sub>2.5</sub> exposure in China from 2000 to 2016.

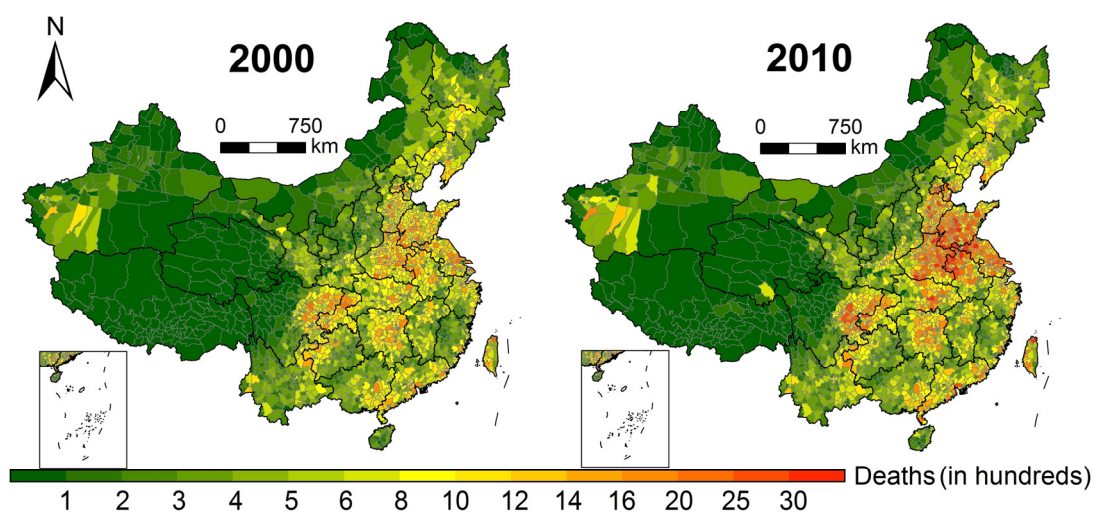

**Fig. S4.** County-level annual premature deaths attributable to long-term PM<sub>2.5</sub> exposure in China in 2000 and 2010.

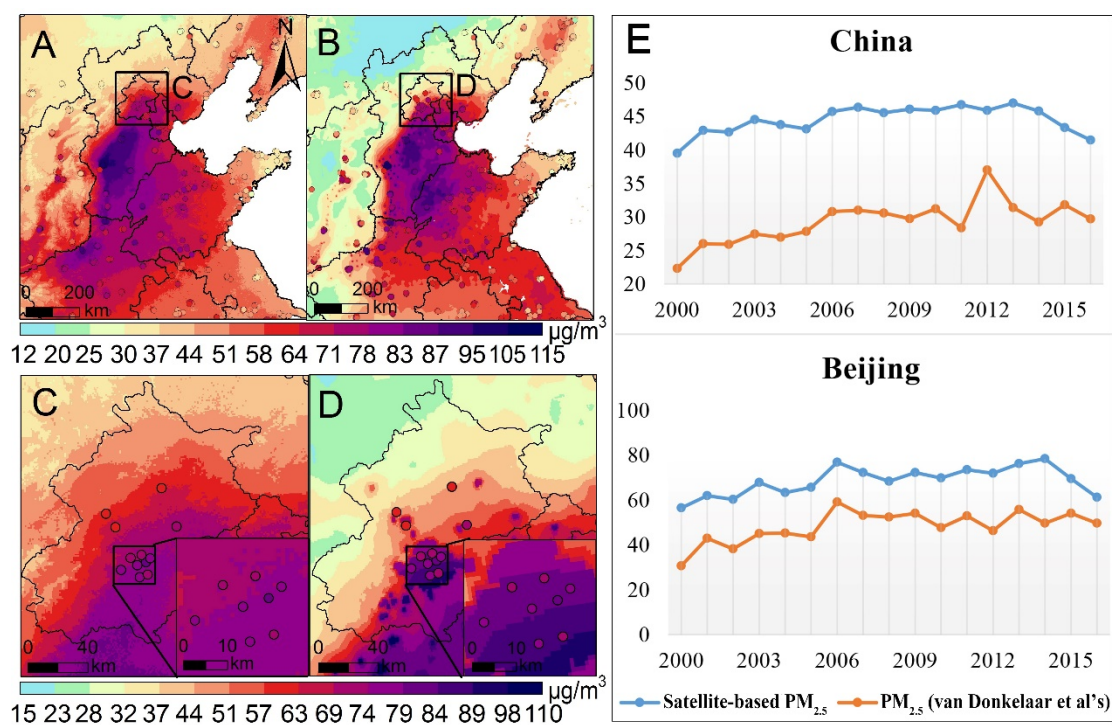

**Fig. S5.** Spatial and temporal comparisons of annual mean  $PM_{2.5}$  concentrations estimated by the present work and van Donkelaar et al. A and B are the annual mean  $PM_{2.5}$  concentrations in North China Plain in 2016 estimated by our study and van Donkelaar et al, respectively. C and D are the annual mean  $PM_{2.5}$  concentrations in Beijing in 2016 estimated by our study and van et al, respectively. Circles in A, B, C, and D are annual mean  $PM_{2.5}$  measurements from ground monitors in 2016. E shows the temporal trends of annual mean  $PM_{2.5}$  concentrations in China and Beijing from 2000 to 2016.

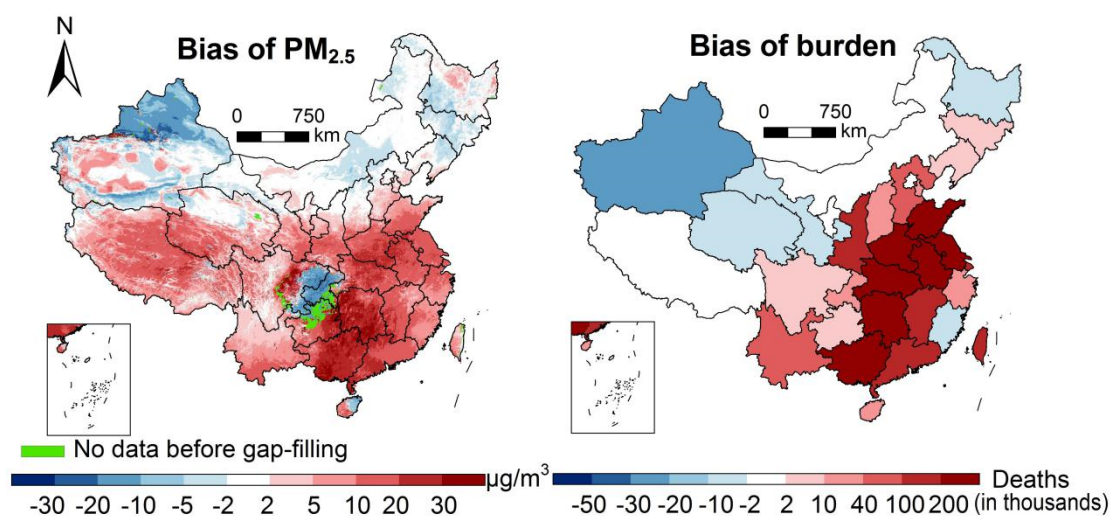

**Fig. S6.** Estimated biases of long-term PM<sub>2.5</sub> concentrations and premature deaths attributable to PM<sub>2.5</sub> exposures using satellite-based PM<sub>2.5</sub> estimates without filling missingness in AOD (during 2000 and 2016). Machine-learning models were re-run using all predictors in the main models, except that the original AOD data with missingness were used instead of the gap-filled AOD. Thereafter, mortality burden of adults in each province of China during 2000 and 2016 was calculated. The estimated bias of PM<sub>2.5</sub> estimation was presented as difference between 17-year averaged PM<sub>2.5</sub> estimates before gap-filling and those after gap-filling. The estimated bias of mortality burden was presented as the difference between estimated mortality burden using non-filled PM<sub>2.5</sub> concentrations and that using gap-filled PM<sub>2.5</sub>.

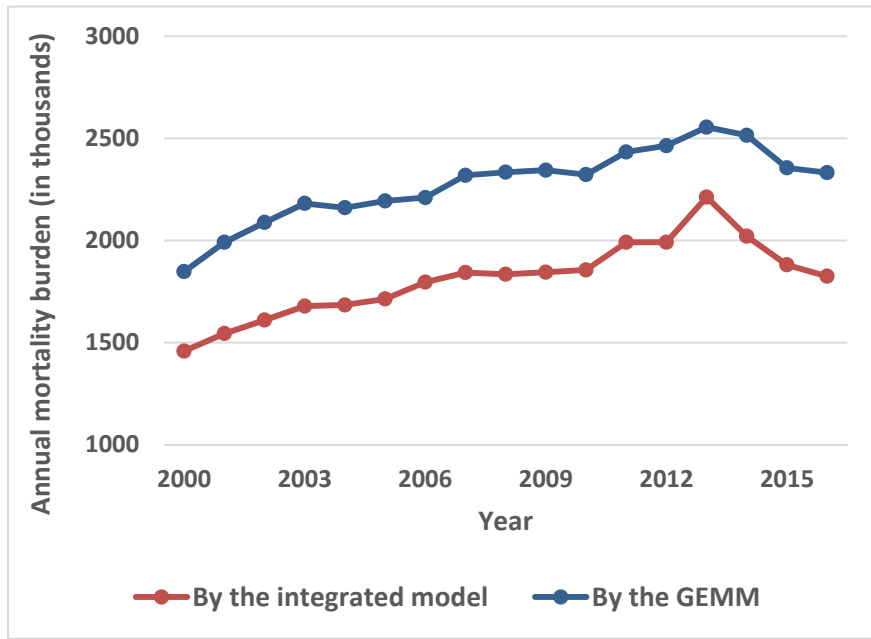

**Fig. S7.** Annual mortality burden estimated by our exposure-response curve and the Global Exposure Mortality Model (GEMM).



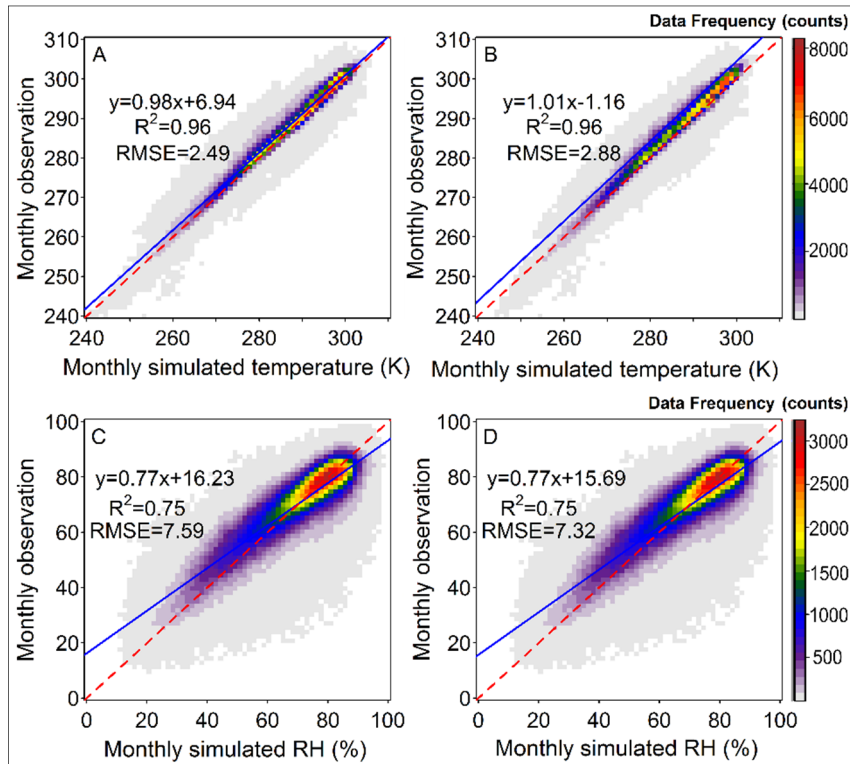

**Fig. S8.** Comparisons of cross-validation generated temperature and relative humidity (RH) and ground measurements using inverse distance weighting (IDW) and Ordinary Kriging. A and B are cross-validation performances for temperature by the IDW approach and the Ordinary Kriging model, respectively; C and D are cross-validation performances for relative humidity by the IDW approach and the Ordinary Kriging model, respectively.

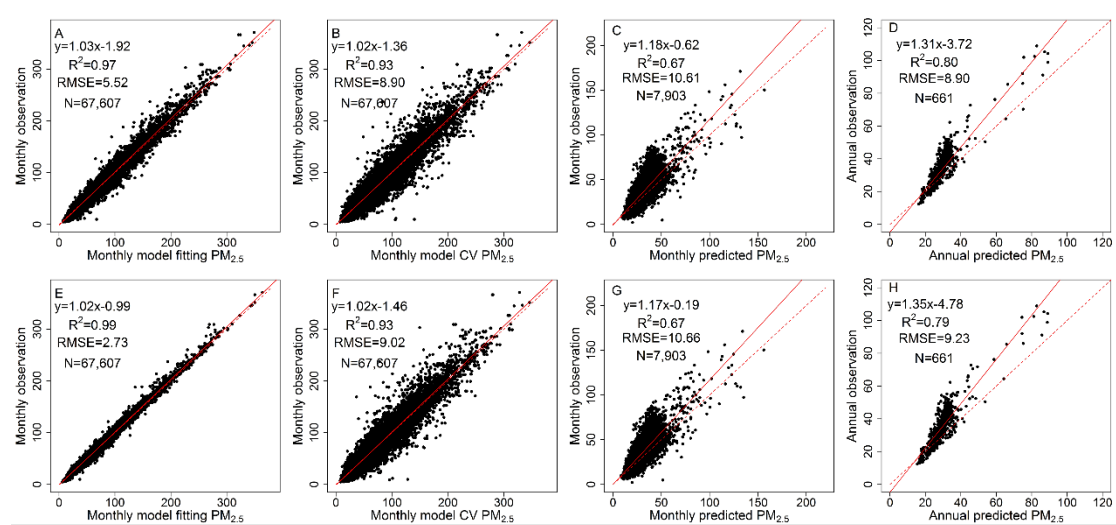

**Fig. S9.** Model fitting, cross-validation and predictive performances for arithmetic averaging and Bayesian model averaging. A to D are performances of arithmetic averaging and E to H are performances of Bayesian model averaging. A and B are model fitting, model cross-validation performances of the arithmetic averaging (2013-2016) at the monthly level, respectively; C and D are predictive performances at the monthly and annual levels for arithmetic averaging (2000-2012), respectively; E and F are model fitting and cross-validation performances of the Bayesian model averaging (2013-2016) at the monthly level, respectively; G and H are predictive performances at the monthly and annual levels for Bayesian model averaging (2000-2012), respectively.

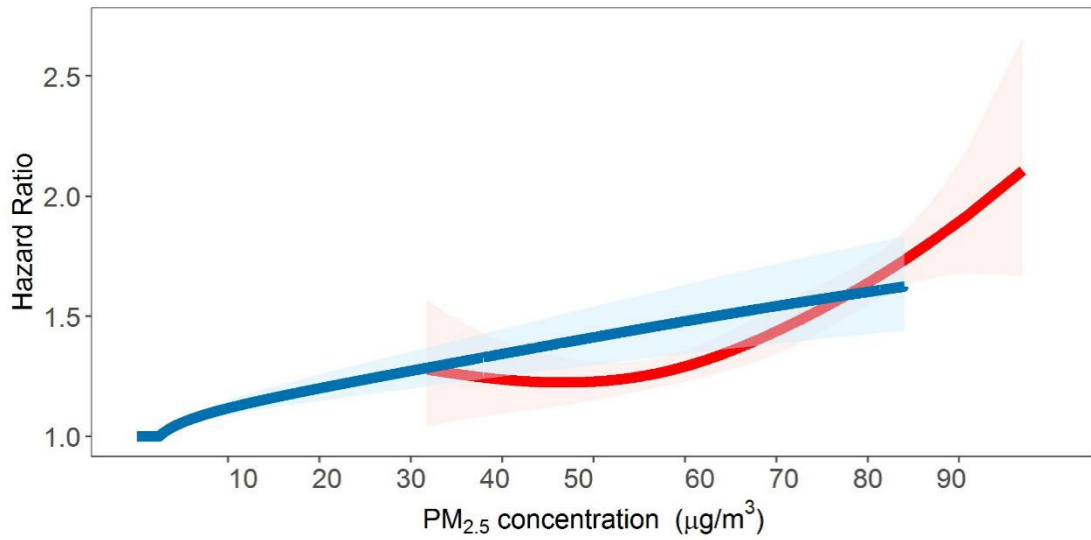

**Fig. S10.** The exposure-response curve for long-term PM<sub>2.5</sub> exposure and adult mortality. Blue curve and shading are function from the Global Exposure Mortality Model (GEMM) and its 95% confidence interval. Red curve and red shading are the concentration-response function and 95% confidence interval in China calibrated using the reference value (i.e., the health effect modeled by the GEMM at 31.2 µg/m<sup>3</sup>). Effect modeled by the GEMM was calculated as:

$$HR(C) = \exp \left\{ \frac{\theta \log \left( \frac{z}{\alpha} + 1 \right)}{1 + \exp \left( -\frac{z - \mu}{\nu} \right)} \right\}, \text{ where } z = \max(0, C - 2.4 \mu\text{g}/\text{m}^3)$$

Where HR(C) is the hazard ratio of non-accident mortality under annual mean PM<sub>2.5</sub> concentration. In this model, 2.4 µg/m<sup>3</sup> was used as a counterfactual concentration, below which the hazard ratio of mortality associated with PM<sub>2.5</sub> exposure was assumed to be constant (i.e., Hazard Ratio=1.00); z is the max concentration difference between zero and (C - 2.4); θ, α, μ, ν are the modeled age-specific parameters.

**Table S1.** Detailed information about PM<sub>2.5</sub> observations from 2000 to 2012 used for historical validation.

| Source                                        | Region    | Time period | N of sites | N of monthly observations |
|-----------------------------------------------|-----------|-------------|------------|---------------------------|
| Hong Kong environmental protection department | Hong Kong | 2000-2012   | 12         | 777                       |
| Taiwan environmental protection agency        | Taiwan    | 2000-2012   | 73         | 6973                      |
| Tsinghua University                           | Beijing   | 2007-2008   | 2          | 77                        |
| The U.S. Embassy                              | Beijing   | 2008-2012   | 1          | 53                        |
| The U.S. Embassy                              | Shanghai  | 2011-2012   | 1          | 12                        |
| The U.S. Embassy                              | Guangzhou | 2012        | 1          | 11                        |

**Table S2.** Model cross-validation performances of random forest model, extreme gradient boosting model, and their prediction averages.

| Cluster       | Random forest model |       | Extreme gradient boosting model |       | Mean of the two model predictions |       |
|---------------|---------------------|-------|---------------------------------|-------|-----------------------------------|-------|
|               | R <sup>2</sup>      | RMSE  | R <sup>2</sup>                  | RMSE  | R <sup>2</sup>                    | RMSE  |
| Overall       | 0.93                | 9.32  | 0.93                            | 9.11  | 0.93                              | 8.90  |
| Southeast     | 0.93                | 6.54  | 0.93                            | 6.29  | 0.93                              | 6.18  |
| Qinghai-Tibet | 0.90                | 8.70  | 0.91                            | 8.16  | 0.91                              | 8.12  |
| North         | 0.92                | 11.81 | 0.91                            | 11.97 | 0.92                              | 11.53 |
| Northeast     | 0.90                | 9.72  | 0.91                            | 9.08  | 0.91                              | 9.06  |
| Northwest     | 0.85                | 17.53 | 0.86                            | 17.00 | 0.87                              | 16.29 |
| PRD           | 0.91                | 6.75  | 0.93                            | 6.24  | 0.93                              | 6.23  |
| YRD           | 0.93                | 9.18  | 0.93                            | 9.12  | 0.93                              | 8.88  |

R<sup>2</sup>, coefficient of determination; RMSE, root mean squared prediction error; PRD, Pearl River Delta; YRD, Yangtze River Delta.
